# Supplementary material for: Sex-specific competitive social feedback amplifies the role of early life contingency in male mice
Source: PubMed Central journal article supplement — bioRxiv. 2024 Apr 21:2024.04.19.590322. Preprint. [Version 1] doi: 10.1101/2024.04.19.590322 (PMC11042324; doi:10.1101/2024.04.19.590322), 2024-04-21
Supplement: NIHPP2024.04.19.590322V1-supplement-1.pdf [file NIHPP2024.04.19.590322V1-supplement-1.pdf]

610 **Supplement:**

611 **Table S1.** The spatial and social phenotypes measured on a daily basis in our animals, from age 15  
612 to 58 days.

|                                | <b>Phenotype</b>                                   | <b>Description</b>                                                                                                                                                                                                                                                                                                     |
|--------------------------------|----------------------------------------------------|------------------------------------------------------------------------------------------------------------------------------------------------------------------------------------------------------------------------------------------------------------------------------------------------------------------------|
| <b>Spatial Phenotypes</b>      | <b>Resource Zones Visited</b>                      | The number of resource zones visited by an animal each night. Range = 0-16, mean = 6.0. Detected via at least one RFID read at a given zone on a given night.                                                                                                                                                          |
|                                | <b>Transitions Between Zones</b>                   | The number of times that an animal moved from one resource zone to another, each night. Range = 0-141, mean = 16. Detected by a change in an animal's zone location between subsequent RFID reads.                                                                                                                     |
|                                | <b>Transitions Between Neighborhoods</b>           | The number of times that an animal moved from one neighborhood of resource zones to another, each night. Range = 0-26, mean = 2.9. Detected by a change in an animal's neighborhood location between subsequent RFID reads (see Figure 1 for neighborhood distribution).                                               |
|                                | <b>Time of First Nightly Transition</b>            | The number of hours past noon on a given night that an animal made its first transition between resource zones. 'NA' if no transitions occurred. Range = 2.1-23.1, mean = 5.7. Detected as the time stamp for the first transition each night.                                                                         |
|                                | <b>Proportion of Reads in Top Zone</b>             | The proportion of RFID reads that were recorded from an animal in its most visited zone (the zone with the most RFID reads for that animal). 'NA' if an animal did not visit any zones on a given night. A measure of spatial fidelity. Range = 0.15-1, mean = 0.62.                                                   |
|                                | <b>Proportion of Reads in Top Neighborhood</b>     | The proportion of RFID reads that were recorded from an animal in its most visited neighborhood (the neighborhood with the most RFID reads for that animal). 'NA' if an animal did not visit any zones on a given night. A measure of spatial fidelity. Range = 0.32-1, mean = 0.89.                                   |
| <b>Basic Social Phenotypes</b> | <b>Number of Males Met</b>                         | The number of males that an animal encountered in or around a resource zone each night. Range = 0-27, mean = 9.6. Measured based on the number of males that a given individual was inferred to overlap with for at least 1 second at a resource zone.                                                                 |
|                                | <b>Number of Females Met</b>                       | The number of females that an animal encountered in or around a resource zone each night. Range = 0-35, mean = 12.3. Measured based on the number of males that a given individual was inferred to overlap with for at least 1 second at a resource zone.                                                              |
|                                | <b>Total Number of Animals Met</b>                 | The sum of the number of males and females that an animal met each night. Range = 0-54, mean = 21.9.                                                                                                                                                                                                                   |
|                                | <b>Proportion Time Spent Alone</b>                 | The proportion of all time that we inferred an animal spent in or around a resource zone for which it was the only animal inferred to be present. Range = 0-1, mean = 0.40.                                                                                                                                            |
|                                | <b>Proportion Time Spent with the Opposite Sex</b> | The proportion of all time that we inferred an animal spent in or around a resource zone for which at least one member of the opposite sex was inferred to also be present. Range = 0-1, mean = 0.39.                                                                                                                  |
|                                | <b>Territory Score</b>                             | For each zone we calculated the proportion of all same-sex RFID reads that occurred at each zone. We then calculated the proportion of those reads that originated with each animal (sum = 1). For each night, we then summed this value across all 16 resource zones for each animal. For males, this is a measure of |

|                                  |                                   |                                                                                                                                                                                                                                                                                                      |
|----------------------------------|-----------------------------------|------------------------------------------------------------------------------------------------------------------------------------------------------------------------------------------------------------------------------------------------------------------------------------------------------|
|                                  |                                   | <p>competitive ability. For females, interpretation is difficult, but it is most closely a measure of isolation from other females. Range = 0-2.7, mean = 0.3.</p> <p>See methods for additional details.</p>                                                                                        |
| <b>Social Network Phenotypes</b> | <b>Edge Strength</b>              | The average strength of the connection between each animal and all other animals that it was connected to in the network each night. A measure of the strength of its average social relationship. Range = 0-4.1, mean = 0.5.                                                                        |
|                                  | <b>Opposite Sex Edge Strength</b> | The average strength of the connection between each animal and all other animals of the opposite sex that it was connected to in the network each night. A measure of the strength of its average social relationship. Range = 0-3.3, mean = 0.2.                                                    |
|                                  | <b>Eigenvector Centrality</b>     | A measure of how connected an animal was to other members of the network, taking into consideration the strength of connectivity of each animal that the focal animal was connected to. Range = 0-1, mean = 0.28.                                                                                    |
|                                  | <b>Betweenness Centrality</b>     | A measure of centrality that is based on the extent to which an animal lay along the shortest path between other pairs of animals in the network. Range = 0-576, mean = 29.                                                                                                                          |
|                                  | <b>Closeness Centrality</b>       | A measure of centrality based on the length of the average path between any given animal and other animals in the network. Calculated as the inverse sum of the path length (number of connective steps) between the focal animal and each other animal in the network. Range = 0.27-1, mean = 0.61. |

613

614

615 **Table S3.** Loadings of each of the 16 phenotypes included in the principal component analysis onto  
616 principal components 1 and 2

| Phenotype                                            | PC1 Loading | PC2 Loading |
|------------------------------------------------------|-------------|-------------|
| Resource Zones Visited                               | 0.35        | 0.03        |
| Total Number of Animals Met                          | 0.34        | 0.24        |
| Number of Females Met                                | 0.33        | 0.20        |
| Transitions Between Neighborhoods                    | 0.30        | 0.05        |
| Transitions Between Zones                            | 0.28        | 0.28        |
| Number of Males Met                                  | 0.27        | 0.25        |
| Betweenness Centrality                               | 0.24        | 0.20        |
| Eigenvector Centrality                               | 0.20        | 0.23        |
| Proportion Observed Time Spent Alone                 | 0.20        | -0.36       |
| Resource Access                                      | 0.07        | 0.08        |
| Closeness Centrality                                 | -0.12       | 0.37        |
| Opposite Sex Edge Strength                           | -0.18       | 0.42        |
| Proportion Observed Time Spent with the Opposite Sex | -0.20       | 0.36        |
| Edge Strength                                        | -0.22       | 0.40        |
| Proportion of Reads in Top Neighborhood              | -0.23       | -0.03       |
| Proportion of Reads in Top Zone                      | -0.29       | 0.05        |

617

618

619 **Table S3.** The relationship between average adult resource access and each other adult phenotype  
 620 measured for each sex.

| Phenotype                                                           | Sex    | R <sup>2</sup> | p value         |
|---------------------------------------------------------------------|--------|----------------|-----------------|
| Average Opposite Sex Edge Strength                                  | Male   | 0.69           | < <b>0.0001</b> |
|                                                                     | Female | 0.02           | 0.32            |
| Nightly Females Met                                                 | Male   | 0.68           | < <b>0.0001</b> |
|                                                                     | Female | 0.06           | 0.09            |
| Number of Nightly Transitions Between Zones                         | Male   | 0.65           | < <b>0.0001</b> |
|                                                                     | Female | 0.05           | 0.11            |
| Total Nightly Animals Met                                           | Male   | 0.35           | < <b>0.0001</b> |
|                                                                     | Female | 0.04           | 0.16            |
| Time of First Nightly Transition Between Zones                      | Male   | 0.37           | < <b>0.0001</b> |
|                                                                     | Female | 0.07           | 0.07            |
| Betweenness Centrality                                              | Male   | 0.27           | < <b>0.0001</b> |
|                                                                     | Female | 0.00           | 0.75            |
| Closeness Centrality                                                | Male   | 0.28           | < <b>0.0001</b> |
|                                                                     | Female | 0.03           | 0.25            |
| Number of Nightly Transitions Between Neighborhoods <sup>^</sup>    | Male   | 0.22           | <b>0.002</b>    |
|                                                                     | Female | 0.10           | <b>0.03</b>     |
| Proportion of Nightly Reads in Top Neighborhood                     | Male   | 0.34           | < <b>0.0001</b> |
|                                                                     | Female | 0.23           | <b>0.0008</b>   |
| Average Edge Strength                                               | Male   | 0.32           | < <b>0.0001</b> |
|                                                                     | Female | 0.27           | <b>0.0002</b>   |
| Eigen Vector Centrality                                             | Male   | 0.15           | <b>0.01</b>     |
|                                                                     | Female | 0.09           | <b>0.04</b>     |
| Proportion of Observed Time Spent With a Member of the Opposite Sex | Male   | 0.08           | 0.06            |
|                                                                     | Female | 0.04           | 0.20            |
| Nightly Males Met                                                   | Male   | 0.01           | 0.50            |
|                                                                     | Female | 0.00           | 0.87            |
| Nightly Resource Zones Visited                                      | Male   | 0.00           | 0.78            |
|                                                                     | Female | 0.08           | 0.06            |
| Proportion of Nightly Reads in Top Resource Zone                    | Male   | 0.05           | 0.13            |
|                                                                     | Female | 0.11           | <b>0.02</b>     |
| Proportion of Observed Time Spent Alone                             | Male   | 0.16           | <b>0.009</b>    |
|                                                                     | Female | 0.31           | < <b>0.0001</b> |

621 <sup>^</sup>Analysis excludes animal 3059-1, which was an extreme outlier on this metric

622

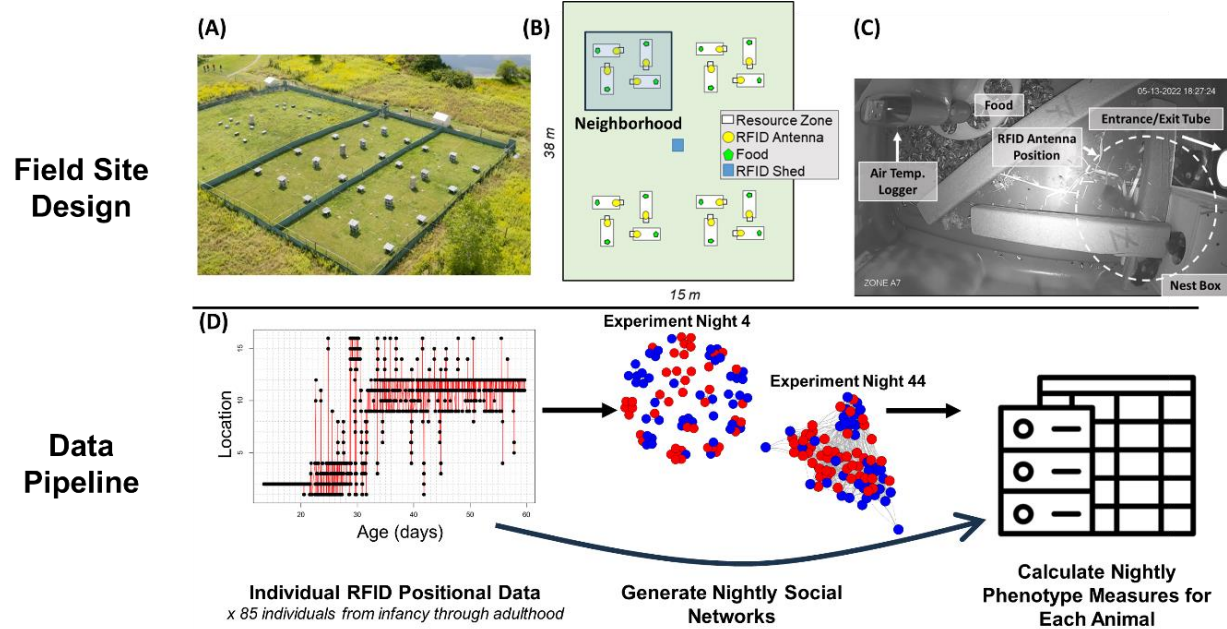

623

624 **Figure S1. The experimental approach.** (A) An aerial view of our field site. Note that the  
625 configuration of resource zones in this photograph is different from the configuration in this  
626 experiment. (B) Schematic layout of our field enclosure in this experiment (not to scale). We placed  
627 litters, along with their mothers inside of the nest box in one of 16 resource zones, which were  
628 distributed into four “neighborhoods” of four zones each. (C) An interior view of one of our resource  
629 zones. (D) Overview of data processing pipeline for our experiment. Example RFID positional data  
630 show the known location of a single individual in our enclosure over the course of the experiment.  
631 Each point represents an RFID read at a given resource zone (y-axis). Red lines between points  
632 indicate transitions between resource zones.

633

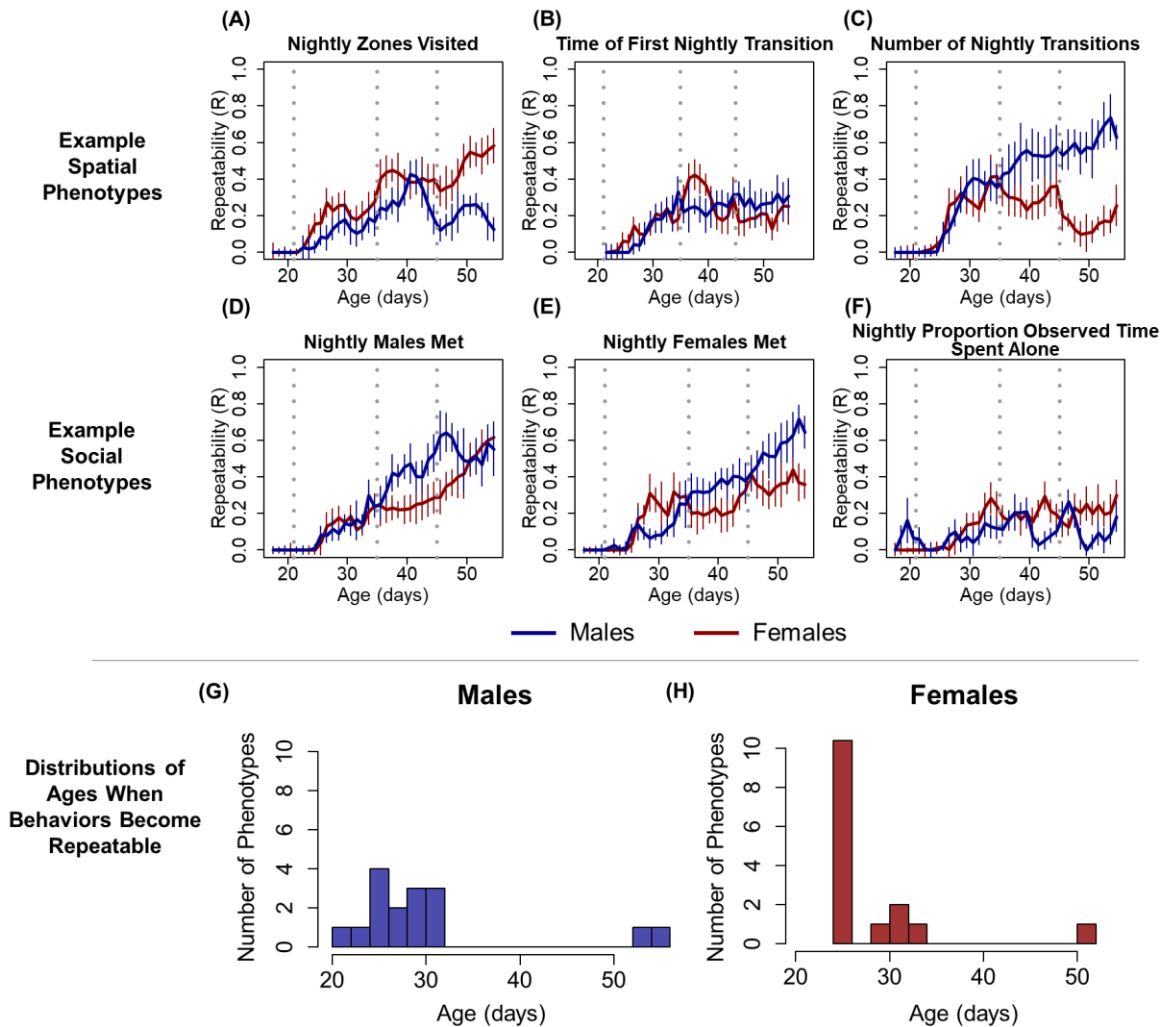

634

635 **Figure S2. Both males and females developed repeatable individual differences in spatial and**  
636 **social phenotypes, beginning in the juvenile period.** (A-F) Examples of repeatability data for four  
637 representative spatial and social phenotypes. The repeatability measure on the y-axis controls for  
638 maternal/litter identity. Each point represents individual repeatability estimates from each sex  
639 during a sliding five-day window, with the x-axis value representing the center of that window. Error  
640 bars indicate standard error of repeatability estimates. Vertical dashed lines indicate approximate  
641 ages of weaning (21 days), sexual maturity (35 days), and first successful mating (46 days). (G-H)  
642 The distributions of the ages at which behaviors became repeatable for males and females.

643

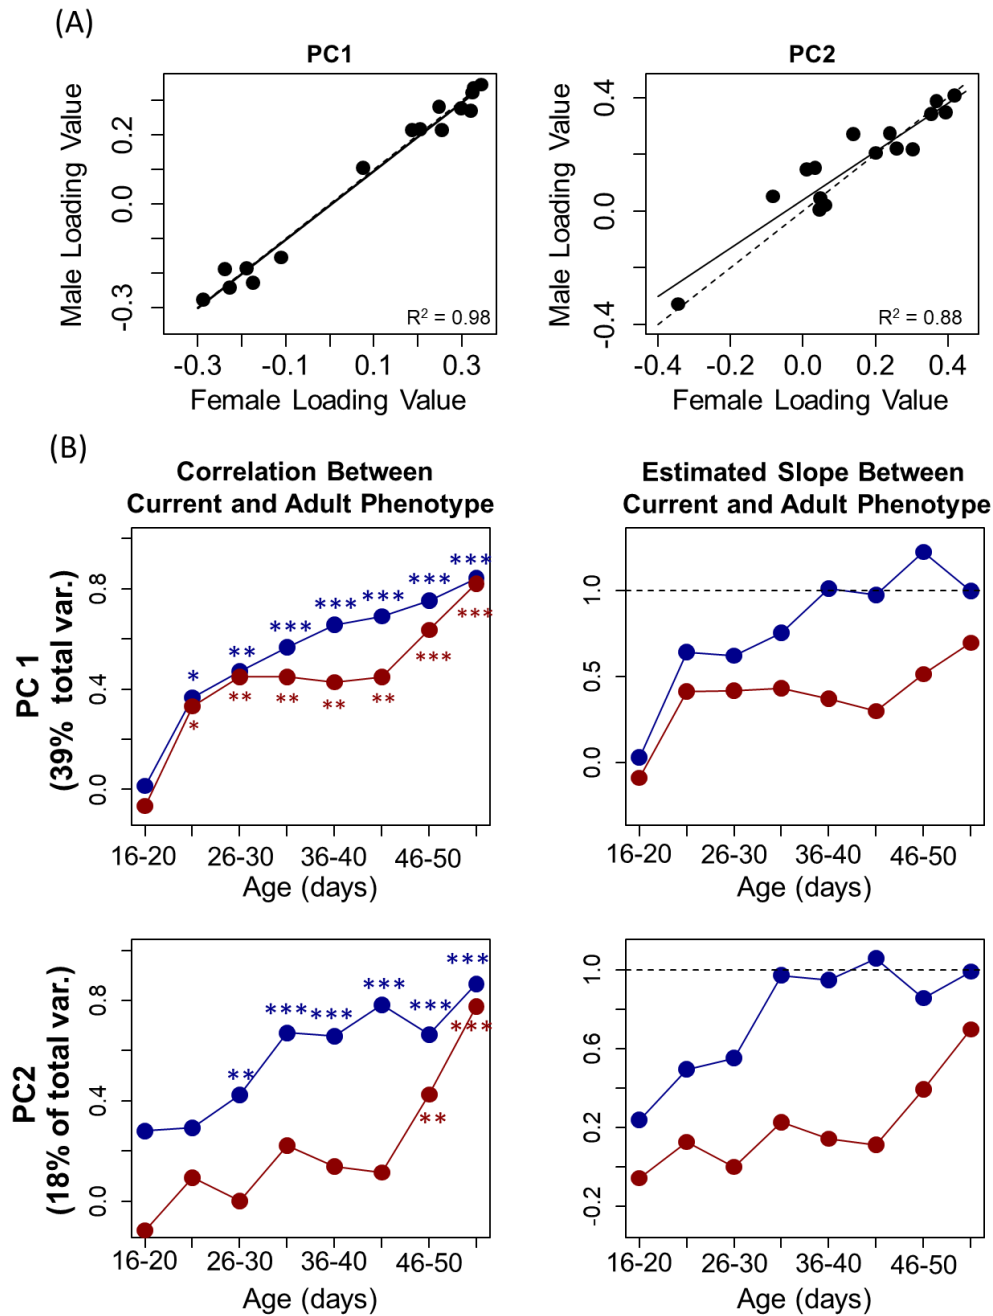

644

645 **Figure S3.** Results in Figure 1 are unchanged if we use a sex-specific principal components  
 646 approach. (A) Loading coefficients of individual phenotypes are extremely similar in male-specific  
 647 and female-specific principal components 1 and 2. Solid line indicates modeled correlation,  
 648 dashed line indicates a one-to-one theoretical ideal. (B) The same analyses as in Figure 1B, except  
 649 using sex-specific principal components 1 and 2. The correlation between earlier and adult  
 650 behavior is stronger in males for both PC1 and PC2 and the slope of the relationship between  
 651 earlier and adult behavior is closer to 1. Asterisks denote significance of the correlations depicted  
 652 in each point (\*  $p < 0.05$ , \*\*  $p < 0.01$ , \*\*\*  $p < 0.001$ ).

653

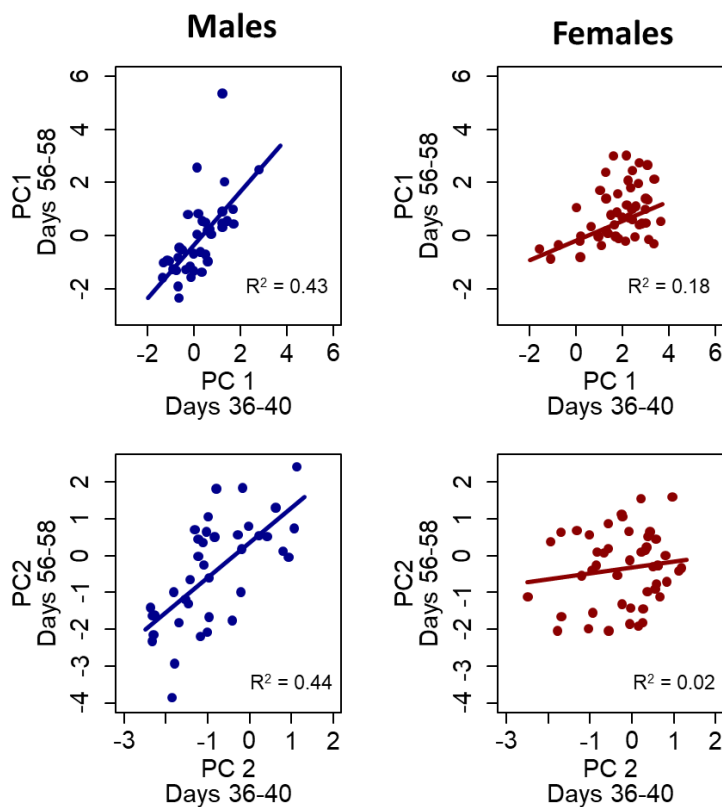

654

655 **Figure S4. An example of the sets of models contained in Figure 1B.** Here we compare the  
656 relationship between behavior immediately after sexual maturity (age 36-40 days) and later  
657 behavior in adulthood at the end of the experiment (days 56-68 days). For both PC1 (top row) and  
658 PC2 (bottom row) the relationship is stronger and the slope estimates are closer to 1.00 for males  
659 as compared to females.

660



661

662

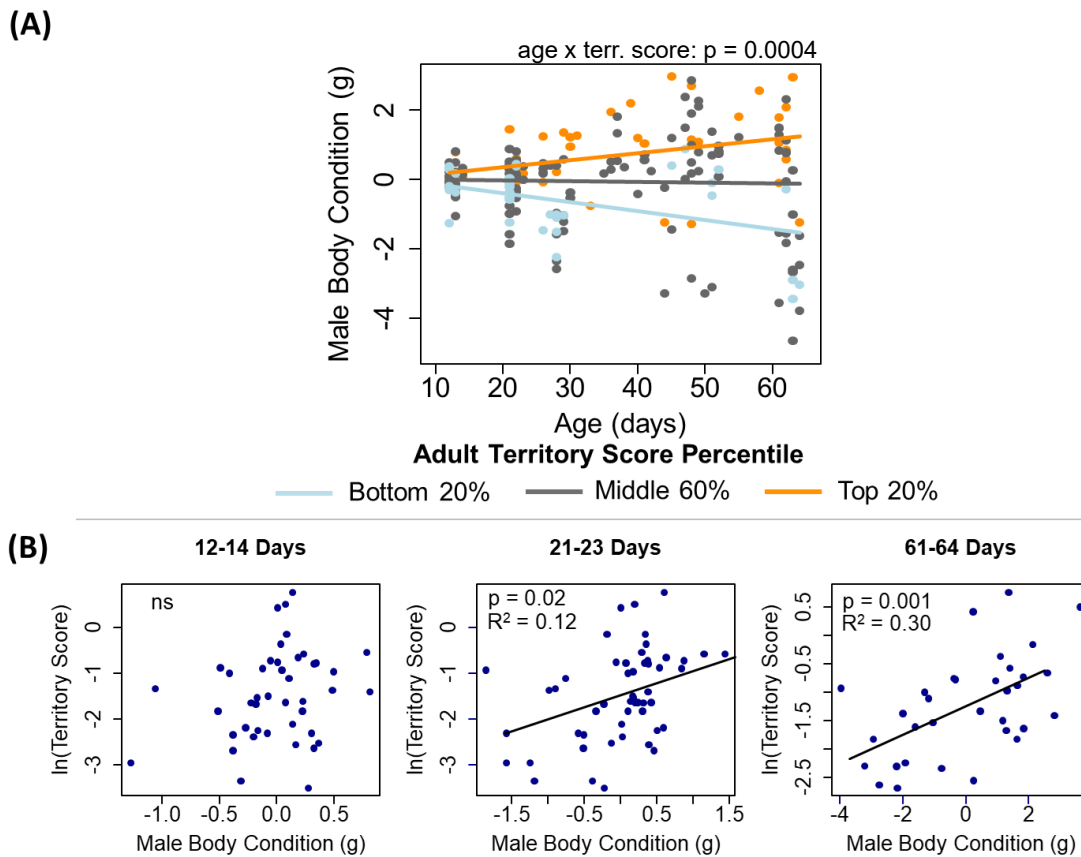

663 **Figure S5.** Small differences in initial male body mass are magnified by differential territorial  
664 access. (A) The same data as in Figure 3C, but here presented as individual data points. Male adult  
665 territory scores are predicted by small differences in body mass in early life, a difference that is  
666 magnified over time. The y-axes represent deviations from age-predicted body mass. (B) The  
667 strength of the relationship between body condition and adult territory score (days 46-58) increases  
668 as males age. Although we collected opportunistic body masses from individuals throughout the  
669 experiment, we collected body masses from all animals in the enclosure at three different points:  
670 (1) prior to release (age 12-14 days), at weaning (21-23 days), and after we ended the experiment  
671 (61-64 days). Initial body condition in infancy did not predict final territory scores (consistent with  
672 individuals starting out on an approximately even playing field. However, as males aged, the  
673 correlation between territorial behavior and body mass increased in strength, consistent with a  
674 competitively induced feedback loop.

675
